# Supplementary material
Source: PubMed Central journal article supplement (PMC3274591)

# HP1 $\gamma$ GFTDADNTWEPEENLDCEPELIEAFLNSQK (3+)

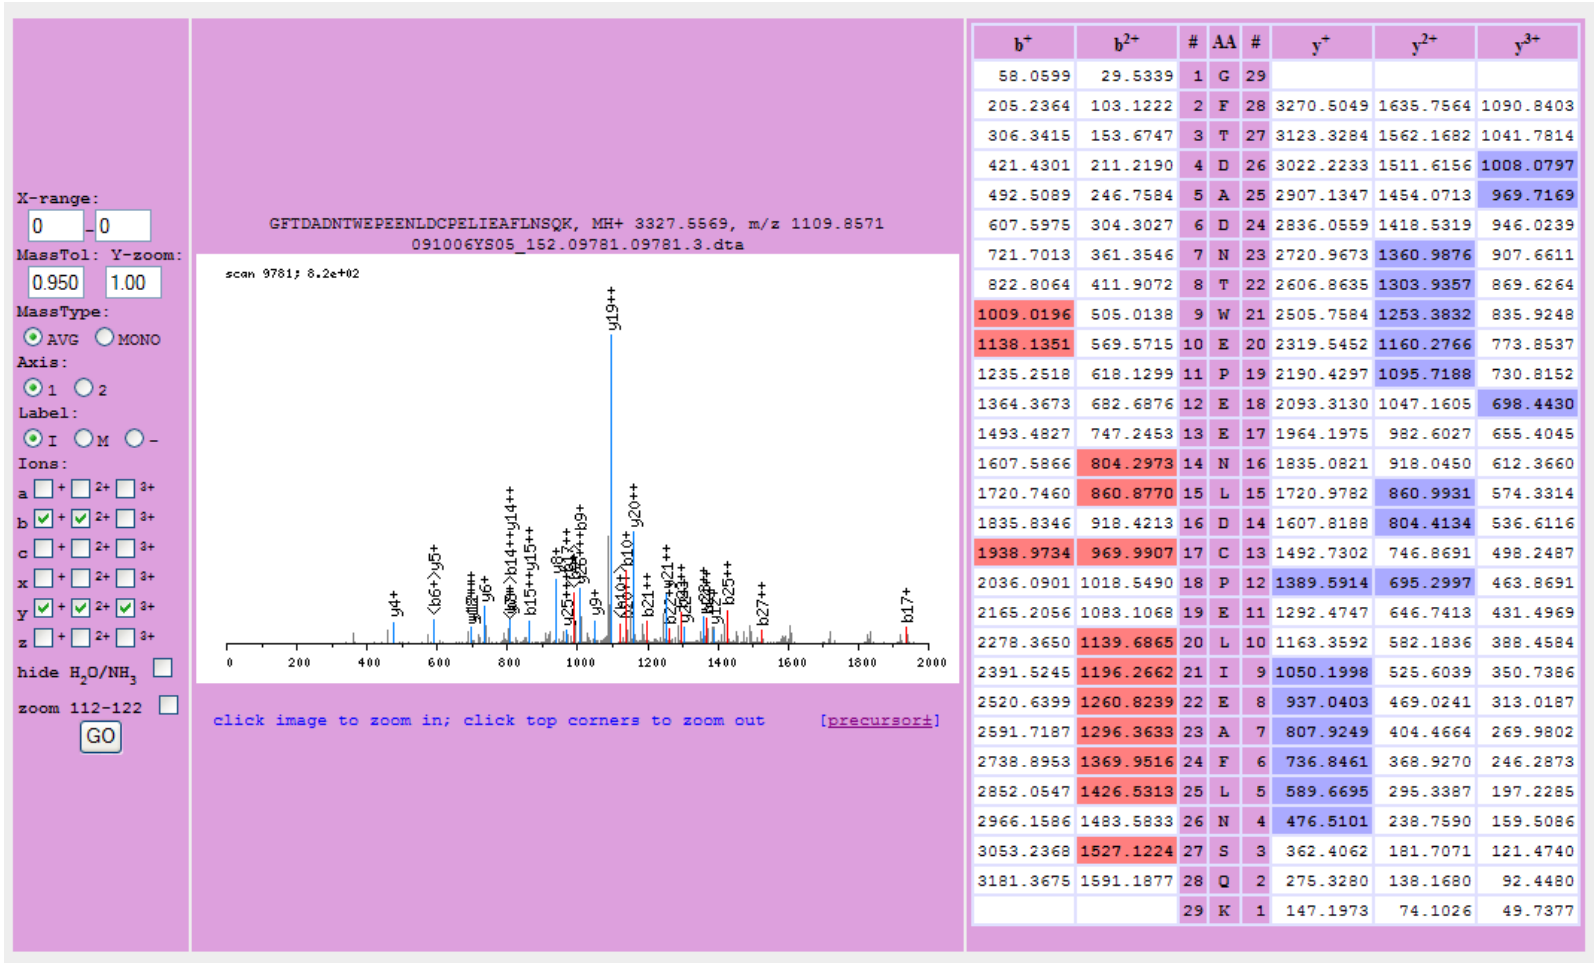

# HP1 $\gamma$ LTWHSCPEDEAQ (2+)

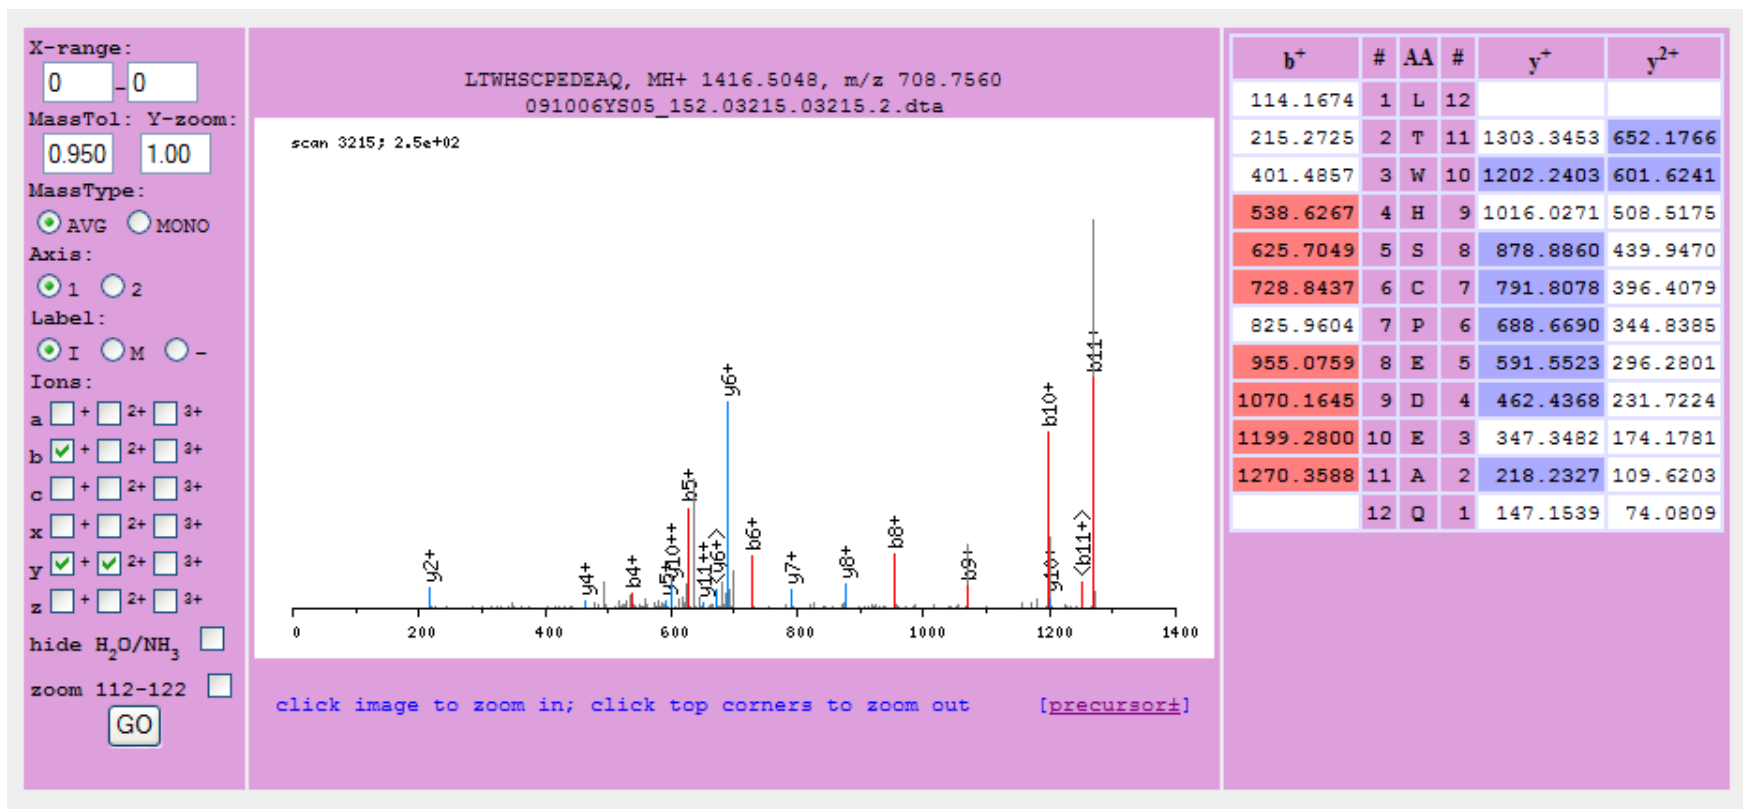

# HP1 $\gamma$ WKDSDEADLVLAK (3+)

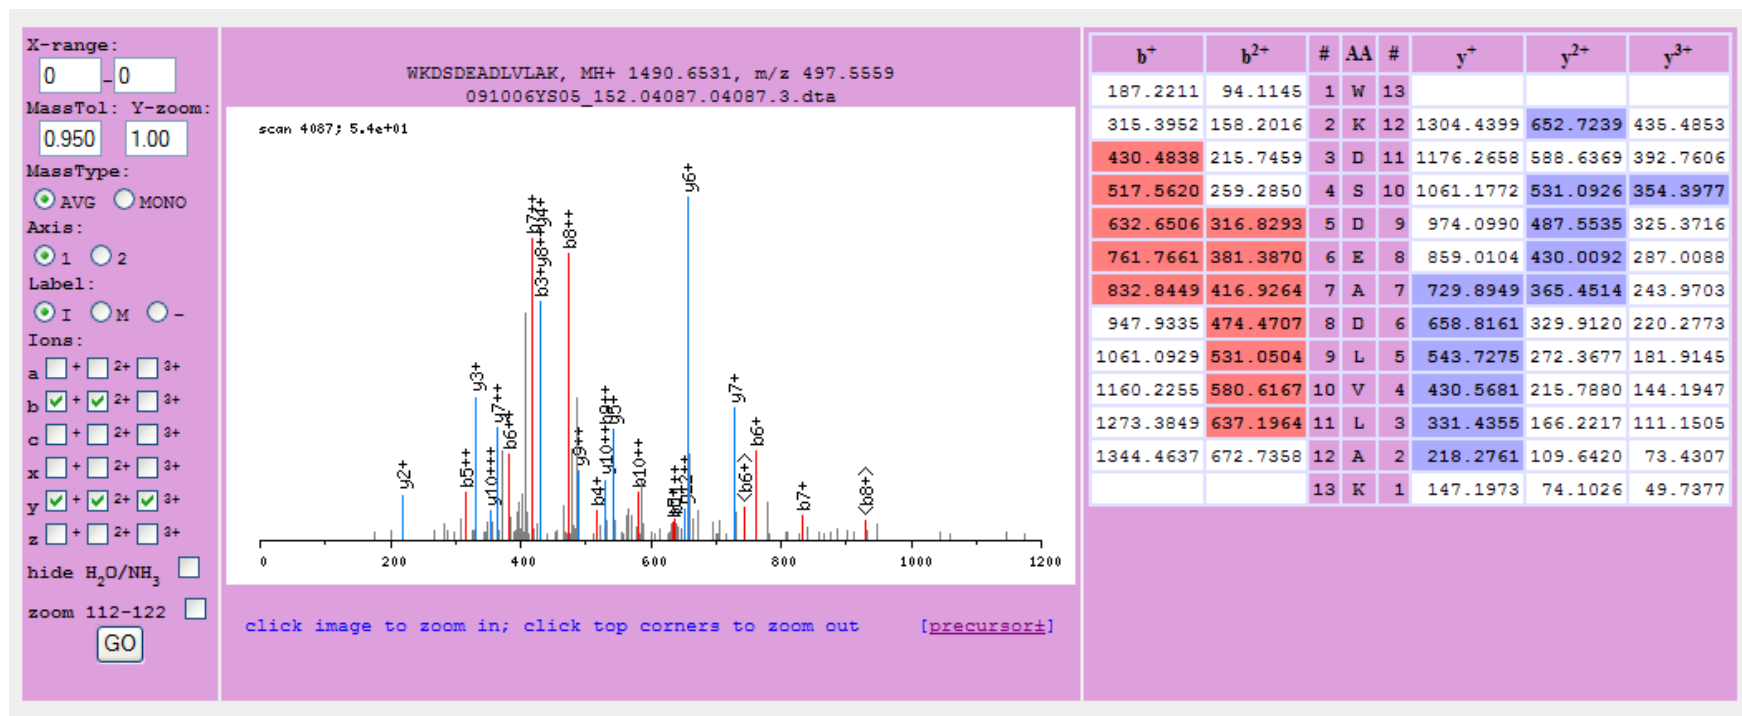

# HP1 $\gamma$ VEEAEPEEFVVEK (2+)

X-range:  -

MassTol: Y-zoom:

MassType:  
 AVG  MONO

Axis:  
 1  2

Label:  
 I  M  -

Ions:  
a  +  2+  3+  
b  +  2+  3+  
c  +  2+  3+  
x  +  2+  3+  
y  +  2+  3+  
z  +  2+  3+

hide H<sub>2</sub>O/NH<sub>3</sub>

zoom 112-122

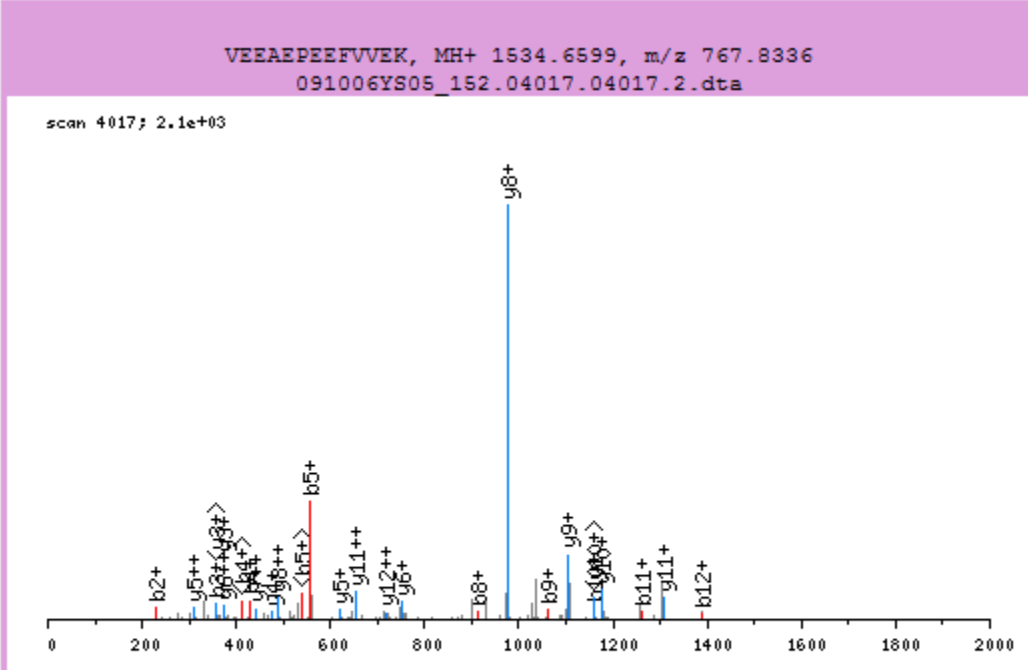

click image to zoom in; click top corners to zoom out [\[precursor±\]](#)

| b <sup>+</sup> | #  | AA | #  | y <sup>+</sup> | y <sup>2+</sup> |
|----------------|----|----|----|----------------|-----------------|
| 100.1405       | 1  | V  | 13 |                |                 |
| 229.2560       | 2  | E  | 12 | 1435.5273      | 718.2676        |
| 358.3715       | 3  | E  | 11 | 1306.4119      | 653.7099        |
| 429.4503       | 4  | A  | 10 | 1177.2964      | 589.1522        |
| 558.5657       | 5  | E  | 9  | 1106.2176      | 553.6128        |
| 655.6824       | 6  | P  | 8  | 977.1021       | 489.0550        |
| 784.7979       | 7  | E  | 7  | 879.9854       | 440.4967        |
| 913.9134       | 8  | E  | 6  | 750.8699       | 375.9389        |
| 1061.0899      | 9  | F  | 5  | 621.7545       | 311.3812        |
| 1160.2225      | 10 | V  | 4  | 474.5779       | 237.7929        |
| 1259.3551      | 11 | V  | 3  | 375.4453       | 188.2266        |
| 1388.4705      | 12 | E  | 2  | 276.3128       | 138.6604        |
|                | 13 | K  | 1  | 147.1973       | 74.1026         |

# HP1 $\gamma$ KVEEAPEEFVVEK (3+)

X-range:  -

MassTol: Y-zoom:

MassType:  AVG  MONO

Axis:  1  2

Label:  I  M  -

Ions:

a  +  2+  3+

b  +  2+  3+

c  +  2+  3+

x  +  2+  3+

Y  +  2+  3+

z  +  2+  3+

hide H<sub>2</sub>O/NH<sub>3</sub>

zoom 112-122

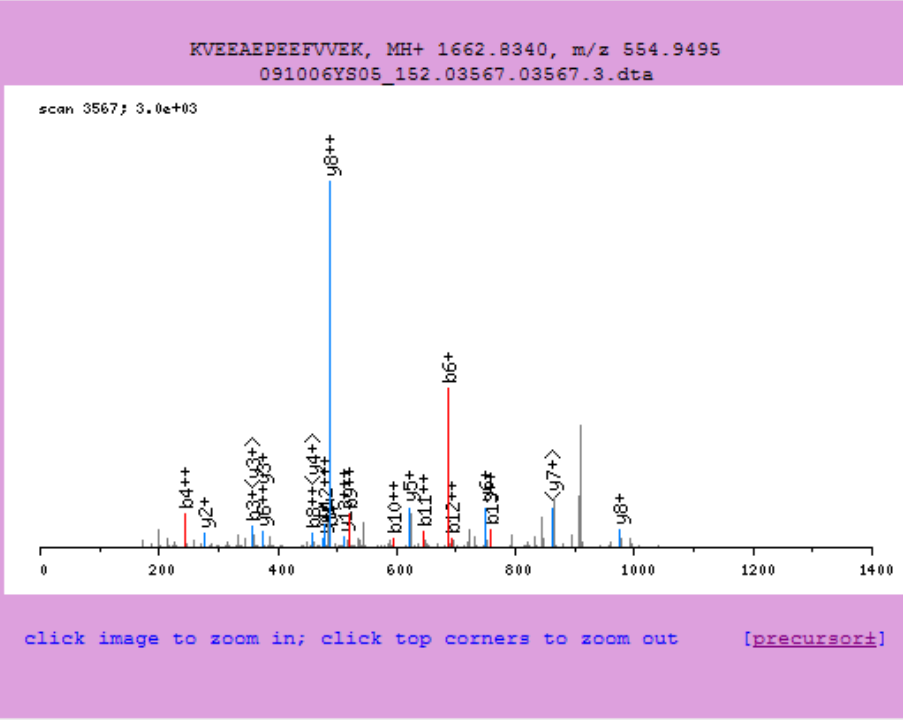

| b <sup>+</sup> | b <sup>2+</sup> | #  | AA | #  | y <sup>+</sup> | y <sup>2+</sup> | y <sup>3+</sup> |
|----------------|-----------------|----|----|----|----------------|-----------------|-----------------|
| 129.1820       | 65.0950         | 1  | K  | 14 |                |                 |                 |
| 228.3146       | 114.6613        | 2  | V  | 13 | 1534.6599      | 767.8339        | 512.2253        |
| 357.4301       | 179.2190        | 3  | E  | 12 | 1435.5273      | 718.2676        | 479.1811        |
| 486.5455       | 243.7767        | 4  | E  | 11 | 1306.4119      | 653.7099        | 436.1426        |
| 557.6243       | 279.3161        | 5  | A  | 10 | 1177.2964      | 589.1522        | 393.1041        |
| 686.7398       | 343.8739        | 6  | E  | 9  | 1106.2176      | 553.6128        | 369.4112        |
| 783.8565       | 392.4322        | 7  | P  | 8  | 977.1021       | 489.0550        | 326.3727        |
| 912.9720       | 456.9900        | 8  | E  | 7  | 879.9854       | 440.4967        | 294.0004        |
| 1042.0875      | 521.5477        | 9  | E  | 6  | 750.8699       | 375.9389        | 250.9619        |
| 1189.2640      | 595.1360        | 10 | F  | 5  | 621.7545       | 311.3812        | 207.9234        |
| 1288.3966      | 644.7023        | 11 | V  | 4  | 474.5779       | 237.7929        | 158.8646        |
| 1387.5291      | 694.2685        | 12 | V  | 3  | 375.4453       | 188.2266        | 125.8204        |
| 1516.6446      | 758.8263        | 13 | E  | 2  | 276.3128       | 138.6604        | 92.7762         |
|                |                 | 14 | K  | 1  | 147.1973       | 74.1026         | 49.7377         |

# HP1β GFSDDEDNTWEPEENLDCPDLIAEFLQSQK (3+)

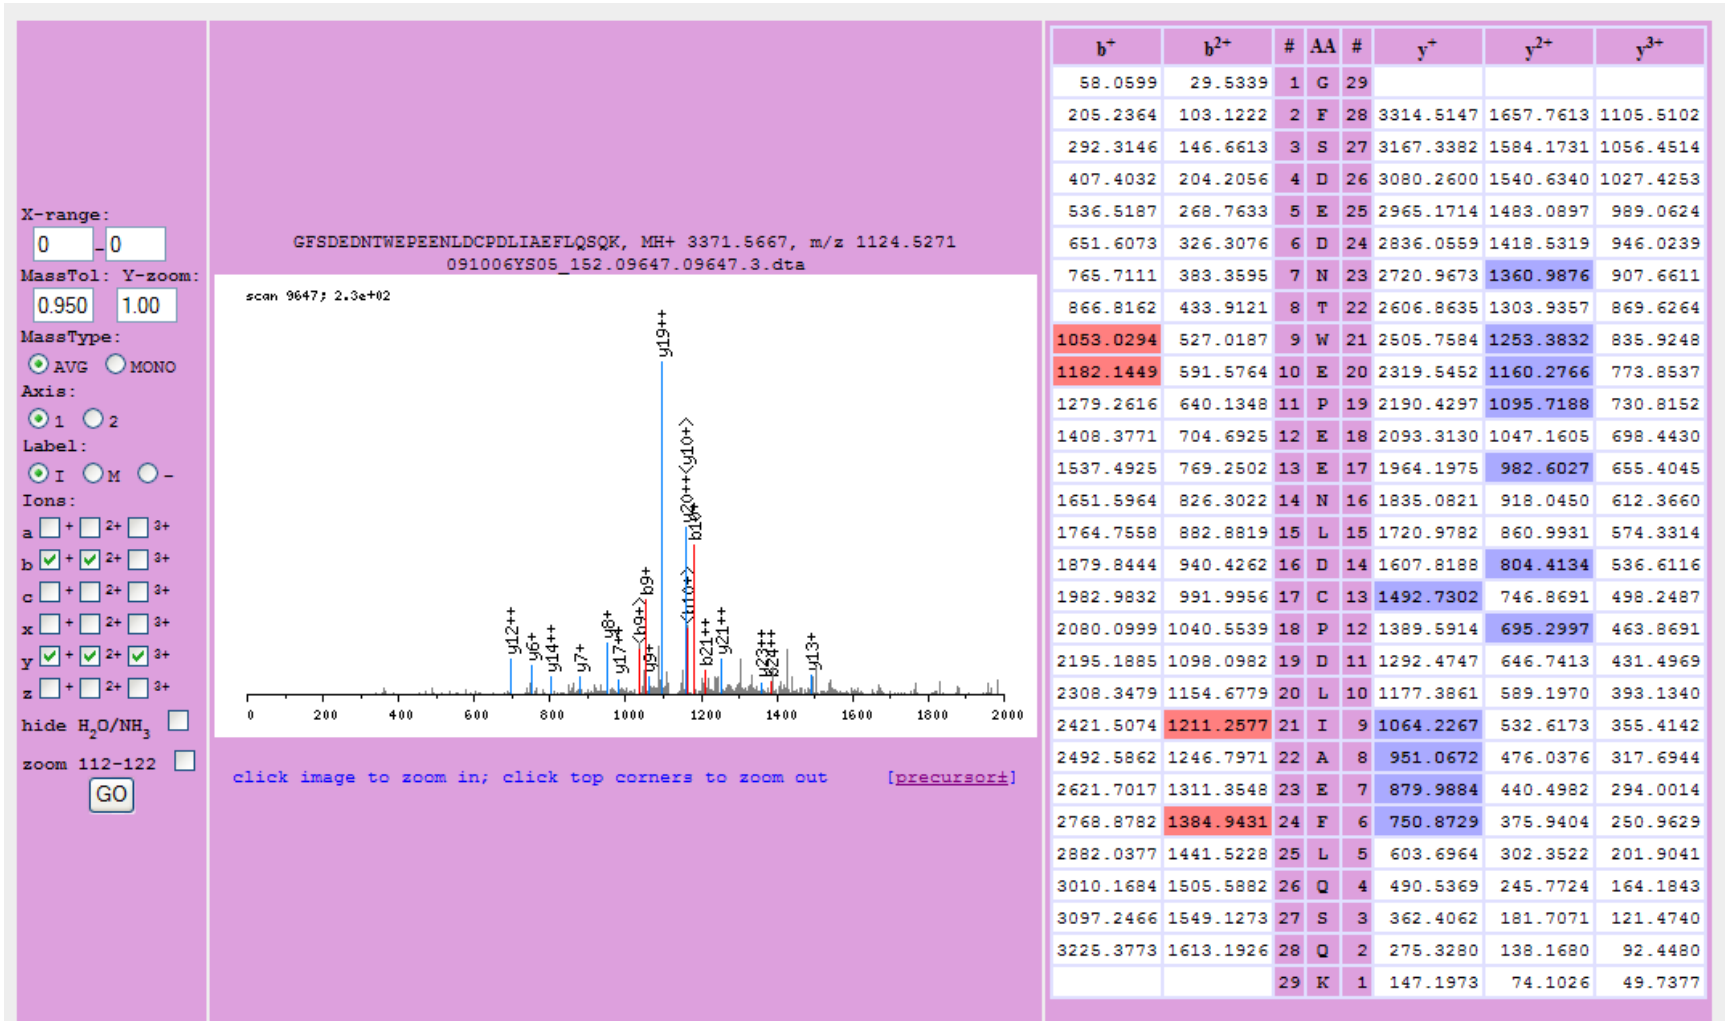

Supplement: NIHMS347845-supplement-01.pdf [file NIHMS347845-supplement-01.pdf]
